# Supplementary material for: Evanescent Wave Optical-Fiber Aptasensor for Rapid Detection of Zearalenone in Corn with Unprecedented Sensitivity
Source: MDPI journal article supplement (doi:10.3390/bios12070438), 2022-06-22
Supplement: s1 [file s1]

## **Supporting Information**

### **Evanescent Wave Optical-Fiber Aptasensor for Rapid Detection of Zearalenone in Corn with Unprecedented Sensitivity**

Haixu Zhao<sup>†</sup>, Shang Ren<sup>†</sup>, Zhenzhe Wei, and Xinhui Lou\*

Department of Chemistry, Capital Normal University, Xisanhuan North Road. 105,  
Beijing 100048, China

<sup>†</sup> The authors contributed equally to this work.

\*To whom correspondence should be addressed. Tel: +86-10-68902491 ext. 808;  
E-mail: xinhuiou@cnu.edu.cn

**Table S1.** ZEN-binding aptamers used in the aptasensors

| Aptamer name     | Sequence (5'-3')                                                                                       | Length (nt) | Kd (nM)      | Ref. |
|------------------|--------------------------------------------------------------------------------------------------------|-------------|--------------|------|
| Z31N             | ATGGTACATTACTATCTGTAATGTGATAT                                                                          | 29          | 11.77 ± 1.44 | 1    |
| 8Z <sub>31</sub> | TCATCTATCTATGGTACATTACTATCTGTAATGTGATATG                                                               | 40          | 41±5         | 2    |
| ZEN-62           | CTACCAGCTTTGAGGCTCGATCCAGCTTATTCAATTATACCAGCTTATTCAA<br>TTATACCAGC                                     | 62          | 15.2±3.4     | 3    |
| ZEN-38           | GATGGGGAAAGGGTCCCCCTGGGTTGGAGCATCGGACA                                                                 | 38          | 2200±400     | 4    |
| Number46         | GGAATTCTTGATGTTGCCTGGGATTGTTTGGGCCTTGTGTTTTCTTCCGTTC<br>CAACTTAGTAGGATCCCGAA                           | 72          | 50.5 ± 5.4   | 5    |
| ZEN-80           | AGCAGCACAGAGGTCAGATGTCATCTATCTATGGTACATTACTATCTGTAAT<br>GTGATATGCCTATGCGTGCTACCGTGAA                   | 80          | -            | 6    |
| Z100             | ATACCAGCTTATTCAATTCTACCAGCTTTGAGGCTCGATCCAGCTTATTCAA<br>TTATACCAGCTTATTCAATTATACCAGCACAATCGTAATCAGTTAG | 98          | 15.2 ± 3.4   | 7    |

Note: The aptamer names shown in the Table are either the names used in the reported literatures or named according to the length of the aptamer.

**Table S2.** Literature reported aptasensors for the detection ZEN

| No | Aptasensor                                                                                            | Aptamer probe                                | LOD (ng/mL)          | Dynamic range (ng/mL)    | Ref.          |
|----|-------------------------------------------------------------------------------------------------------|----------------------------------------------|----------------------|--------------------------|---------------|
| 1  | Colorimetric competitive ELAA                                                                         | Biotin-8Z <sub>31</sub>                      | 0.7                  | 1-10000                  | <sup>8</sup>  |
| 2  | Colorimetric lateral flow assay                                                                       | HS-8Z <sub>31</sub> -T <sub>29</sub>         | 20                   | 5–200                    | <sup>9</sup>  |
| 3  | Colorimetric                                                                                          | ZEN-98                                       | 4                    | 4–128                    | <sup>7</sup>  |
| 4  | Enhanced ELAA                                                                                         | HS–GAT-8Z <sub>31</sub> -Biotin              | 0.08                 | 0.1–160                  | <sup>10</sup> |
| 5  | Colorimetric-AuNP                                                                                     | ZEN-38                                       | 10                   | 10–250                   | <sup>11</sup> |
| 6  | Colorimetric-aptamer walker, Exo III, and AuNPs                                                       | HS-ZEN-80                                    | 0.01                 | 0.02–80                  | <sup>12</sup> |
| 7  | Fluorescence quenching                                                                                | ZEN-80-FAM                                   | 0.5                  | 0.5- 64                  | <sup>6</sup>  |
| 8  | AIR-SE combined with SPR                                                                              | HS–T <sub>10</sub> -8Z <sub>31</sub>         | 0.08                 | 0.01–1000                | <sup>13</sup> |
| 9  | Green ELAA                                                                                            | Biotin-8Z <sub>31</sub>                      | 0.377                | -                        | <sup>14</sup> |
| 10 | Colorimetric-porous platinum nanotubes, p-PtNTs/AuNPs and thionine (Thi) labelled graphene oxide (GO) | HS-ZEN-98                                    | $1.7 \times 10^{-4}$ | $5 \times 10^{-4}$ –500  | <sup>15</sup> |
| 11 | Fluorescent sensing-Genefinder                                                                        | 8Z <sub>31</sub>                             | 0.1                  | 0.1-200                  | <sup>16</sup> |
| 12 | Fluorescent sensing-mesoporous silica nanoparticle                                                    | 8Z <sub>31</sub> -FAM                        | 0.012                | 0.005–150                | <sup>17</sup> |
| 13 | SERS                                                                                                  | HS-8Z <sub>31</sub>                          | 0.001                | 0.005 -500               | <sup>18</sup> |
| 14 | Electrochemical                                                                                       | 8Z <sub>31</sub>                             | 0.017                | 0.01-1000                | <sup>19</sup> |
| 15 | Competitive electrochemical                                                                           | ZEN-29                                       | $1.5 \times 10^{-3}$ | 0.001-100                | <sup>1</sup>  |
| 16 | Ratiometric fluorescent-CdTe quantum dots (QDs)                                                       | 8Z <sub>31</sub> and NH <sub>2</sub> -ZEN-80 | 2.4                  | 10 -200                  | <sup>20</sup> |
| 17 | FRET- dual-color AuNCs                                                                                | NH <sub>2</sub> -8Z <sub>31</sub>            | $5.3 \times 10^{-4}$ | 0.005–100                | <sup>21</sup> |
| 18 | Optical fiber- localized SPR                                                                          | HS-ZEN-80                                    | 0.102                | 1- 480                   | <sup>22</sup> |
| 19 | Nanofibers for dispersive solid phase extraction (dSPE)                                               | HOOC-8Z <sub>31</sub>                        | $1.8 \times 10^{-5}$ | $6 \times 10^{-5}$ –0.01 | <sup>23</sup> |

| No | Aptasensor                                                                                                                     | Aptamer probe                                     | LOD<br>(ng/mL)        | Dynamic<br>range<br>(ng/mL) | Ref<br>· |
|----|--------------------------------------------------------------------------------------------------------------------------------|---------------------------------------------------|-----------------------|-----------------------------|----------|
| 20 | Magnetic separation and time-resolved fluorescent $\text{Ln}^{3+}$ inorganic nanoparticles.                                    | Biotin-8Z <sub>31</sub>                           | $2.1 \times 10^{-4}$  | 0.001–10                    | 24       |
| 21 | Ratiometric fluorescence                                                                                                       | 8Z <sub>31</sub> -NH <sub>2</sub>                 | $3.2 \times 10^{-4}$  | $3.2 \times 10^{-4}$ -0.32  | 25       |
| 22 | Electrochemical-DNA assembly                                                                                                   | AAA-8Z <sub>31</sub> -SH                          | $5.1 \times 10^{-7}$  | $5.0 \times 10^{-6}$ -50    | 26       |
| 23 | Fluorescence-upconverting nanoparticles                                                                                        | 8Z <sub>31</sub>                                  | 0.007                 | 0.05–100                    | 27       |
| 24 | AuNP-affinity monolithic column                                                                                                | 8Z <sub>31</sub>                                  | 0.05                  | 0.16-60                     | 28       |
| 25 | Photoelectrochemical-ZnO-NGQDs                                                                                                 | ZEN-72-NH <sub>2</sub>                            | $3.3 \times 10^{-5}$  | $1.0 \times 10^{-4}$ –100   | 29       |
| 26 | Fluorometric-lighting-up silver nanocluster                                                                                    | GGTCTATTAACGA<br>AGGTCATTAAC-8Z <sub>3</sub><br>1 | $3.2 \times 10^{-4}$  | $1.3 \times 10^{-3}$ -100   | 30       |
| 27 | Competitive ELAA                                                                                                               | ZEN-72                                            | 0.2                   | 0.03–2.5                    | 5        |
| 28 | Fluorometric-gold nanorods and upconversion nanoparticles                                                                      | 8Z <sub>31</sub> -AAATCATGTC                      | 0.01                  | 0.05–100                    | 31       |
| 29 | Dual-colored persistent luminescence                                                                                           | HS-8Z <sub>31</sub>                               | $2.2 \times 10^{-4}$  | 0.001–50                    | 32       |
| 30 | Electrochemical-CS@AB-MWCNTs                                                                                                   | 8Z <sub>31</sub> -NH <sub>2</sub>                 | $3.64 \times 10^{-6}$ | $10^{-5}$ –1                | 33       |
| 31 | Fluorometric-DNA tweezer nanomachine                                                                                           | 8Z <sub>31</sub>                                  | 0.037                 | 0.05- 50                    | 34       |
| 32 | Fluorometric                                                                                                                   | 8Z <sub>31</sub>                                  | 0.25                  | 0.1-1000                    | 2        |
| 33 | Fluorometric                                                                                                                   | Biotin-8Z <sub>31</sub>                           | $5.1 \times 10^{-4}$  | 0.001 - 100                 | 35       |
| 34 | Electrochemical-3D sakura-shaped Cu@L-Glu combined with palladium-platinum nanoparticle (Pd-PtNPs) to obtain Cu@L-Glu/Pd-PtNPs | NH <sub>2</sub> -ZEN-80                           | $4.5 \times 10^{-7}$  | $10^{-6}$ - 100             | 36       |
| 35 | Fluorometric-dual-enzyme                                                                                                       | Biotin-ZEN-62                                     | $2.13 \times 10^{-4}$ | $10^{-3}$ –1                | 3        |
| 36 | Electrochemical-PEI-MoS <sub>2</sub> -MWCNTs                                                                                   | 8Z <sub>31</sub> -SH                              | $1.7 \times 10^{-4}$  | $5 \times 10^{-4}$ -50      | 37       |

| No | Aptasensor                                                                        | Aptamer probe                                              | LOD<br>(ng/mL)        | Dynamic<br>range<br>(ng/mL) | Ref<br>·      |
|----|-----------------------------------------------------------------------------------|------------------------------------------------------------|-----------------------|-----------------------------|---------------|
| 37 | Colorimetric-metal-organic<br>framework nano-container and<br>trivalent DNAzyme   | 8Z <sub>31</sub>                                           | $3.6 \times 10^{-4}$  | 0.01–100                    | <sup>38</sup> |
| 38 | SERS-Au@Ag core-shell<br>nanoparticles and gold<br>nanorods                       | HS-8Z <sub>31</sub>                                        | 0.054                 | 0.05 - 500                  | <sup>39</sup> |
| 39 | Electrochemical-AuNPs<br>(rMoS <sub>2</sub> -Au)                                  | HS-8Z <sub>31</sub>                                        | $5 \times 10^{-4}$    | $1 \times 10^{-3}$ –10      | <sup>40</sup> |
| 40 | Electrochemical-CoSe <sub>2</sub> /AuN<br>Rs and 3D structured<br>DNA-PtNi@Co-MOF | CCTCAGCCATATCA<br>CATTAGC TGA-8Z <sub>31</sub>             | $1.37 \times 10^{-6}$ | $10^{-5}$ - 10              | <sup>41</sup> |
| 41 | Pregnancy test strip-catalytic<br>hairpin assembly                                | HS-8Z <sub>31</sub> -TTGTTCTTC<br>ACATTACAGATAGT<br>AATGTA | 0.05                  | 0.05–5,000                  | <sup>42</sup> |

Note: ELAA: enzyme-linked aptamer assay; AIR-SE: attenuated internal reflection spectroscopic ellipsometry; SPR: surface plasmon resonance; SERS: surface-enhanced Raman scattering;

## References

1. Azri, F. A.; Selamat, J.; Sukor, R.; Yusof, N. A.; Raston, N. H. A.; Eissa, S.; Zourob, M.; Chinnappan, R., Determination of minimal sequence for zearalenone aptamer by computational docking and application on an indirect competitive electrochemical aptasensor. *Anal. Bioanal. Chem.* **2021**, *413* (15), 3861-3872.
2. Chen, X.; Huang, Y.; Duan, N.; Wu, S.; Ma, X.; Xia, Y.; Zhu, C.; Jiang, Y.; Wang, Z., Selection and identification of ssDNA aptamers recognizing zearalenone. *Anal. Bioanal. Chem.* **2013**, *405* (20), 6573-6581.
3. Yao, X.; Yang, Q.; Wang, Y.; Bi, C.; Du, H.; Wu, W., Dual-enzyme-based signal-amplified aptasensor for zearalenone detection by using CRISPR-Cas12a and Nt.AlwI. *Foods* **2022**, *11* (3), 487.
4. Le, L. C.; Cruz-aguado, J. A.; Penner, G. A., DNA ligand For aflatoxin and zearalenone. *U.S. WO 2011/020198 A1* **2011**.
5. Wang, Y.-K.; Zou, Q.; Sun, J.-H.; Wang, H.-a.; Sun, X.; Chen, Z.-F.; Yan, Y.-X., Screening of single-stranded DNA (ssDNA) aptamers against a zearalenone monoclonal antibody and development of a ssDNA-based enzyme-linked oligonucleotide assay for determination of zearalenone in corn. *J. Agric. Food Chem.* **2015**, *63* (1), 136-141.
6. Goud, K. Y.; Hayat, A.; Satyanarayana, M.; Kumar, V. S.; Catanante, G.; Gobi, K. V.; Marty, J. L., Aptamer-based zearalenone assay based on the use of a fluorescein label and a functional graphene oxide as a quencher. *Microchim. Acta* **2017**, *184* (11), 4401-4408.
7. Zhang, Y.; Lu, T.; Wang, Y.; Diao, C.; Zhou, Y.; Zhou, L.; Chen, H., Selection of a DNA aptamer against zearalenone and docking analysis for highly sensitive rapid visual detection with label-free aptasensor. *J. Agric. Food Chem.* **2018**, *66* (45), 12102-12110.
8. Wei, L.; Tan, G.; Yue, L.; Wu, S.; Wang, Z., Visual detection of zearalenone based on competitive enzyme-linked aptamer assay. *Food Sci. Biotechnol.* **2021**, *40* (4), 76-81.
9. Wu, S.; Liu, L.; Duan, N.; Li, Q.; Zhou, Y.; Wang, Z., Aptamer-based lateral flow test strip for rapid detection of zearalenone in corn samples. *J. Agric. Food Chem.* **2018**, *66* (8), 1949-1954.
10. Sun, S.; Xie, Y., An enhanced enzyme-linked aptamer assay for the detection of zearalenone based on gold nanoparticles. *Anal. Methods* **2021**, *13* (10), 1255-1260.
11. Sun, S.; Zhao, R.; Feng, S.; Xie, Y., Colorimetric zearalenone assay based on the use of an aptamer and of gold nanoparticles with peroxidase-like activity. *Microchim. Acta* **2018**, *185* (12), 535.
12. Taghdisi, S. M.; Danesh, N. M.; Ramezani, M.; Emrani, A. S.; Abnous, K., Novel colorimetric aptasensor for zearalenone detection based on nontarget-induced aptamer walker, gold nanoparticles, and exonuclease-assisted recycling amplification. *ACS Appl. Mater. Interfaces* **2018**, *10* (15), 12504-12509.
13. Caglayan, M. O.; Ustundag, Z., Detection of zearalenone in an aptamer assay using attenuated internal reflection ellipsometry and it's cereal sample applications. *Food Chem. Toxicol.* **2020**, *136*, 111081.
14. Xing, K.-Y.; Peng, J.; Shan, S.; Liu, D.-F.; Huang, Y.-N.; Lai, W.-H., Green enzyme-linked immunosorbent assay based on the single-stranded binding protein-assisted aptamer for the detection of mycotoxin. *Anal. Chem.* **2020**, *92* (12), 8422-8426.
15. He, B.; Yan, X., An amperometric zearalenone aptasensor based on signal amplification by using a composite prepared from porous platinum nanotubes, gold nanoparticles and thionine-labelled graphene oxide. *Microchim. Acta* **2019**, *186* (6), 383.

16. Guo, T.; Chen, J.; Zhou, H.; Zhang, Y.; Ma, L., A fluorescent sensing system based on Genefinder for detection of zearalenone. *Food Ferment. Ind* **2021**, *47* (10), 203-206,213.
17. Tan, H.; Guo, T.; Zhou, H.; Dai, H.; Yu, Y.; Zhu, H.; Wang, H.; Fu, Y.; Zhang, Y.; Ma, L., A simple mesoporous silica nanoparticle-based fluorescence aptasensor for the detection of zearalenone in grain and cereal products. *Anal. Bioanal. Chem.* **2020**, *412* (23), 5627-5635.
18. Chen, R.; Sun, Y.; Huo, B.; Mao, Z.; Wang, X.; Li, S.; Lu, R.; Li, S.; Liang, J.; Gao, Z., Development of Fe<sub>3</sub>O<sub>4</sub>@Au nanoparticles coupled to Au@Ag core-shell nanoparticles for the sensitive detection of zearalenone. *Anal. Chim. Acta* **2021**, *1180*, 338888.
19. Azri, F. A.; Eissa, S.; Zourob, M.; Chinnappan, R.; Sukor, R.; Yusof, N. A.; Raston, N. H. A.; Alhoshani, A.; Jinap, S., Electrochemical determination of zearalenone using a label-free competitive aptasensor. *Microchim. Acta* **2020**, *187* (5), 266.
20. Tan, X.; Wang, X.; Hao, A.; Liu, Y.; Wang, X.; Chu, T.; Jiang, L.; Yang, Y.; Ming, D., Aptamer-based ratiometric fluorescent nanoprobe for specific and visual detection of zearalenone. *Microchem. J.* **2020**, *157*, 104943.
21. Khan, I. M.; Niazi, S.; Yu, Y.; Mohsin, A.; Mushtaq, B. S.; Iqbal, M. W.; Rehman, A.; Alhtar, W.; Wang, Z., Aptamer induced multicolored AuNCs-WS2 "turn on" FRET nano platform for dual-color simultaneous detection of aflatoxinB(1) and zearalenone. *Anal. Chem.* **2019**, *91* (21), 14085-14092.
22. Lee, B.; Park, J.-H.; Byun, J.-Y.; Kim, J. H.; Kim, M.-G., An optical fiber-based LSPR aptasensor for simple and rapid in-situ detection of ochratoxin A. *Biosens. Bioelectron.* **2018**, *102*, 504-509.
23. Liu, L.; Ma, Y.; Zhang, X.; Yang, X.; Hu, X., A dispersive solid phase extraction adsorbent based on aptamer modified chitosan nanofibers for zearalenone separation in corn, wheat, and beer samples. *Anal. Methods* **2020**, *12* (48), 5852-5860.
24. Niazi, S.; Wang, X.; Pasha, I.; Khan, I. M.; Zhao, S.; Shoaib, M.; Wu, S.; Wang, Z., A novel bioassay based on aptamer-functionalized magnetic nanoparticle for the detection of zearalenone using time resolved-fluorescence NaYF<sub>4</sub>: Ce/Tb nanoparticles as signal probe. *Talanta* **2018**, *186*, 97-103.
25. Bi, X.; Li, L.; Liu, X.; Luo, L.; Cheng, Z.; Sun, J.; Cai, Z.; Liu, J.; You, T., Inner filter effect-modulated ratiometric fluorescence aptasensor based on competition strategy for zearalenone detection in cereal crops: Using mitoxantrone as quencher of CdTe QDs@SiO<sub>2</sub>. *Food Chem.* **2021**, *349*,129171.
26. Qu, C.; Xin, L.; Yu, S.; Wei, M., A homogeneous electrochemical aptasensor based on DNA assembly for zearalenone detection. *J. Chin. Chem. Soc.* **2021**, *68* (10), 1998-2005.
27. Wu, Z.; Xu, E.; Chughtai, M. F. J.; Jin, Z.; Irudayaraj, J., Highly sensitive fluorescence sensing of zearalenone using a novel aptasensor based on upconverting nanoparticles. *Food Chem.* **2017**, *230*, 673-680.
28. Xu, J.; Chi, J.; Lin, C.; Lin, X.; Xie, Z., Towards high-efficient online specific discrimination of zearalenone by using gold nanoparticles@aptamer-based affinity monolithic column. *J. Chromatogr. A* **2020**, *1620*, 461026.
29. Luo, L.; Liu, X.; Ma, S.; Li, L.; You, T., Quantification of zearalenone in mildewing cereal crops using an innovative photoelectrochemical aptamer sensing strategy based on ZnO-NGQDs composites. *Food Chem.* **2020**, *322*, 126778.
30. Yin, N.; Yuan, S.; Zhang, M.; Wang, J.; Li, Y.; Peng, Y.; Bai, J.; Ning, B.; Liang, J.; Gao, Z., An aptamer-based fluorometric zearalenone assay using a lighting-up silver nanocluster probe and catalyzed by a hairpin assembly. *Microchim. Acta* **2019**, *186* (12), 765.

31. He, D.; Wu, Z.; Cui, B.; Jin, Z.; Xu, E., A fluorometric method for aptamer-based simultaneous determination of two kinds of the fusarium mycotoxins zearalenone and fumonisin B-1 making use of gold nanorods and upconversion nanoparticles. *Microchim. Acta* **2020**, *187* (4), 254.
32. Jiang, Y.-Y.; Zhao, X.; Chen, L.-J.; Yang, C.; Yin, X.-B.; Yan, X.-P., A dual-colored persistent luminescence nanosensor for simultaneous and autofluorescence-free determination of aflatoxin B-1 and zearalenone. *Talanta* **2021**, *232*, 122395.
33. Mu, Z.; Ma, L.; Wang, J.; Zhou, J.; Yuan, Y.; Bai, L., A target-induced amperometric aptasensor for sensitive zearalenone detection by CS@AB-MWCNTs nanocomposite as enhancers. *Food Chem.* **2021**, *340*, 128128.
34. Chen, R.; Mao, Z.; Lu, R.; Wang, Z.; Hou, Y.; Zhu, W.; Li, S.; Ren, S.; Han, D.; Liang, J.; Gao, Z., Simple and programmed three-dimensional DNA tweezer for simultaneous one-step detection of ochratoxin A and zearalenone. *Spectrochim. Acta A Mol. Biomol.* **2022**, *272*, 120991-120991.
35. Niazi, S.; Khan, I. M.; Yu, Y.; Pasha, I.; Shoaib, M.; Mohsin, A.; Mushtaq, B. S.; Akhtar, W.; Wang, Z., A "turnon" aptasensor for simultaneous and time-resolved fluorometric determination of zearalenone, trichothecenes A and aflatoxin B-1 using WS2 as a quencher. *Microchim. Acta* **2019**, *186* (8), 575.
36. Ji, X.; Yu, C.; Wen, Y.; Chen, J.; Yu, Y.; Zhang, C.; Gao, R.; Mu, X.; He, J., Fabrication of pioneering 3D sakura-shaped metal-organic coordination polymers Cu@L-Glu phenomenal for signal amplification in highly sensitive detection of zearalenone. *Biosens. Bioelectron.* **2019**, *129*, 139-146.
37. Ma, L.; Bai, L.; Zhao, M.; Zhou, J.; Chen, Y.; Mu, Z., An electrochemical aptasensor for highly sensitive detection of zearalenone based on PEI-MoS<sub>2</sub>-MWCNTs nanocomposite for signal enhancement. *Anal. Chim. Acta* **2019**, *1060*, 71-78.
38. Sun, Y.; Lv, Y.; Qi, S.; Zhang, Y.; Wang, Z., Sensitive colorimetric aptasensor based on stimuli-responsive metal-organic framework nano-container and trivalent DNAzyme for zearalenone determination in food samples. *Food Chem.* **2022**, *371*, 131145.
39. Chen, R.; Li, S.; Sun, Y.; Huo, B.; Xia, Y.; Qin, Y.; Li, S.; Shi, B.; He, D.; Liang, J.; Gao, Z., Surface-enhanced Raman spectroscopy aptasensor for simultaneous determination of ochratoxin A and zearalenone using Au@Ag core-shell nanoparticles and gold nanorods. *Microchim. Acta* **2021**, *188* (8), 281.
40. Han, Z.; Tang, Z.; Jiang, K.; Huang, Q.; Meng, J.; Nie, D.; Zhao, Z., Dual-target electrochemical aptasensor based on co-reduced molybdenum disulfide and Au NPs (rMoS(2)-Au) for multiplex detection of mycotoxins. *Biosens. Bioelectron.* **2020**, *150*, 111894.
41. He, B.; Yan, X., Ultrasensitive electrochemical aptasensor based on CoSe<sub>2</sub>/AuNRs and 3D structured DNA-PtNi@Co-MOF networks for the detection of zearalenone. *Sens. Actuators, B* **2020**, *306*, 127558.
42. Zhong, Z.-T.; Song, L.-B.; He, Y.-F.; Zhang, B.; Chen, W.; Liu, B.; Zhao, Y.-D., Detection of multiple mycotoxins based on catalytic hairpin assembly coupled with pregnancy test strip. *Sens. Actuators, B* **2022**, *350*, 130911.
